# Supplementary material for: Determinants of response to CDK4/6 inhibitors in the real-world setting
Source: PubMed Central journal article supplement (PMC10499925; doi:10.1038/s41698-023-00438-0), 2023-09-13
Supplement: 41698_2023_438_MOESM1_ESM.pdf [file 41698_2023_438_MOESM1_ESM.pdf]

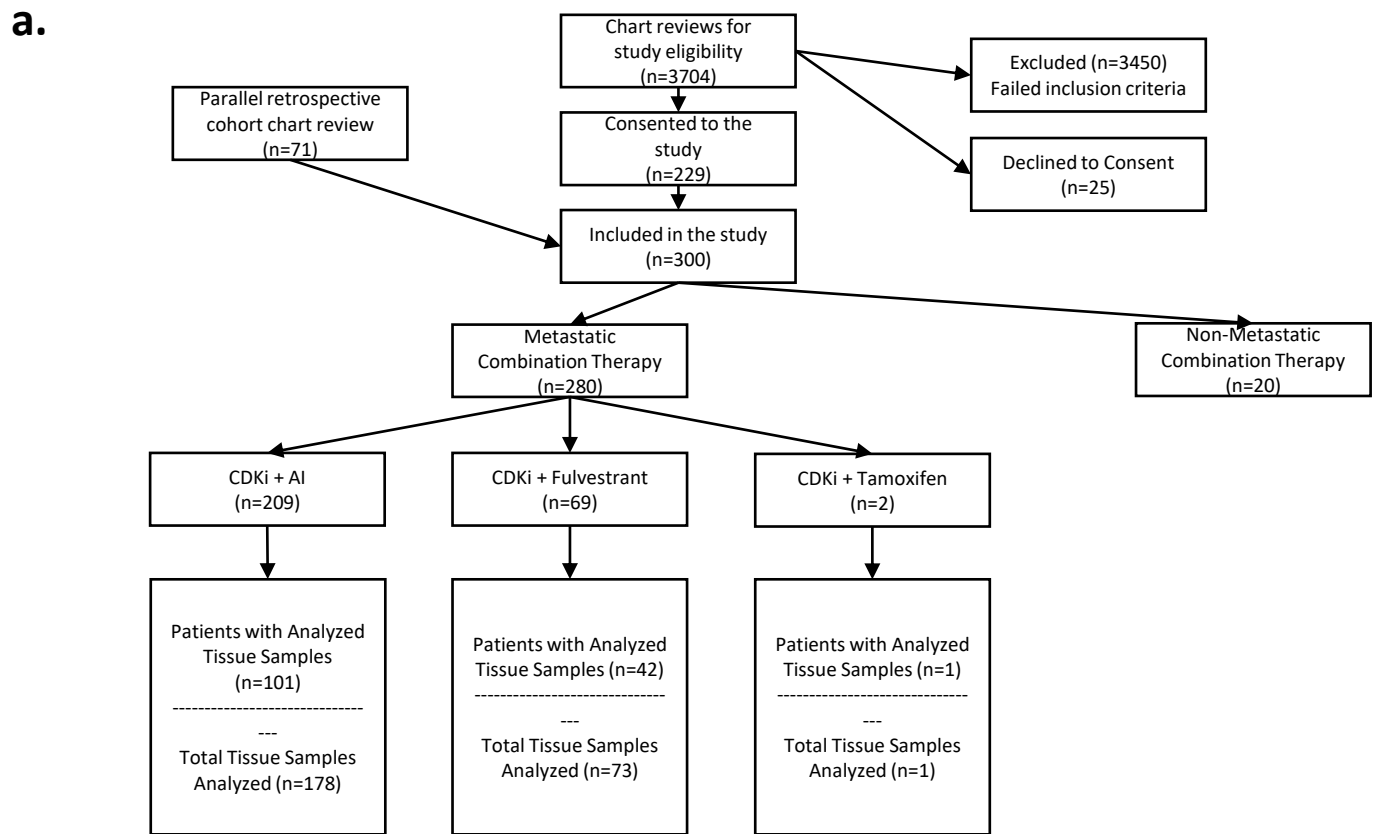

**b.**

| Variable                            | Combined |         | AI     |        | FUL    |       |
|-------------------------------------|----------|---------|--------|--------|--------|-------|
|                                     | HR       | P       | HR     | P      | HR     | P     |
| <b>Visceral Status</b>              | 1.4196   | 0.0331  | 1.324  | 0.164  | 1.3728 | 0.281 |
| <b>Prior Endocrine Therapy</b>      | 1.9834   | 0.00041 | 1.7144 | 0.0123 | 2.2928 | 0.165 |
| <b>De Novo vs Recurrent Disease</b> | 0.7323   | 0.0929  | 0.7458 | 0.17   | 1.3495 | 0.468 |

c.

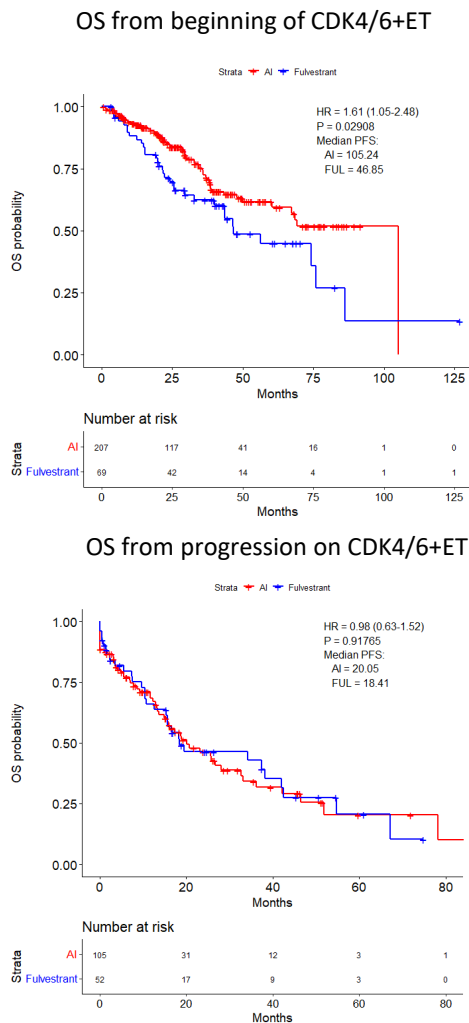

d.

| Treatment                 | Freq | %     | Cumulative % |
|---------------------------|------|-------|--------------|
| Xeloda                    | 89   | 18.23 | 18.2         |
| Taxol                     | 56   | 11.5  | 29.7         |
| Exemestane + Everolimus   | 41   | 8.4   | 38.0         |
| Eribulin                  | 32   | 6.5   | 52.1         |
| Fulvestrant + Piqray      | 29   | 5.9   | 58.1         |
| Doxil                     | 23   | 4.7   | 62.8         |
| Fulvestrant + Everolimus  | 19   | 3.9   | 66.7         |
| Olaparib                  | 15   | 3.1   | 69.7         |
| Enhertu                   | 15   | 3.1   | 72.8         |
| Sacituzumab               | 12   | 2.5   | 75.3         |
| Anastrozole               | 11   | 2.2   | 77.5         |
| Abraxane                  | 10   | 2     | 79.6         |
| Taxol + Gemcitabine       | 9    | 1.8   | 81.4         |
| Letrozole                 | 9    | 1.8   | 83.2         |
| Exemestane                | 8    | 1.6   | 84.9         |
| Adriamycin + Cytosan      | 8    | 1.6   | 86.5         |
| Ixabepoline               | 7    | 1.4   | 87.9         |
| Carboplatin + Gemcitabine | 7    | 1.4   | 89.4         |
| Gemcitabine               | 5    | 1     | 90.4         |
| Vinorelbine               | 4    | 0.8   | 91.2         |
| Palbociclib + Fulvestrant | 4    | 0.8   | 92.0         |

**Supplementary Figure 1.** (a) CONSORT diagram displaying patient screening and selection for gene expression analysis. (b) Table summarizing association of progression free survival with clinically significant variables across the cohorts of patients. (c) Kaplan-Meier analysis of overall survival from start of CDK4/6-based therapy and progression on CDK4/6-based therapy between patients taking AI vs Fulvestrant.  $p=0.029$  and  $p=0.918$  respectively. (d) Table of the predominant therapies after progression on CDK4/6-based therapy.

## AI Cohort (HER2)

a.

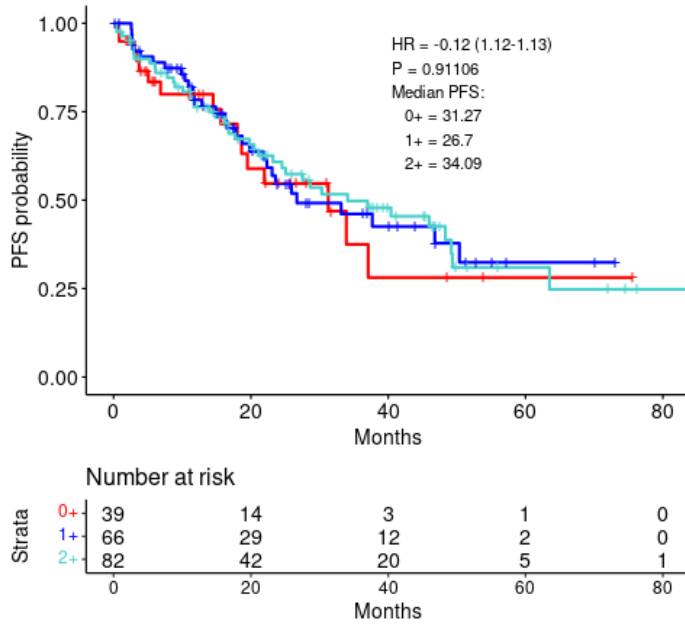

## FUL Cohort (HER2)

b.

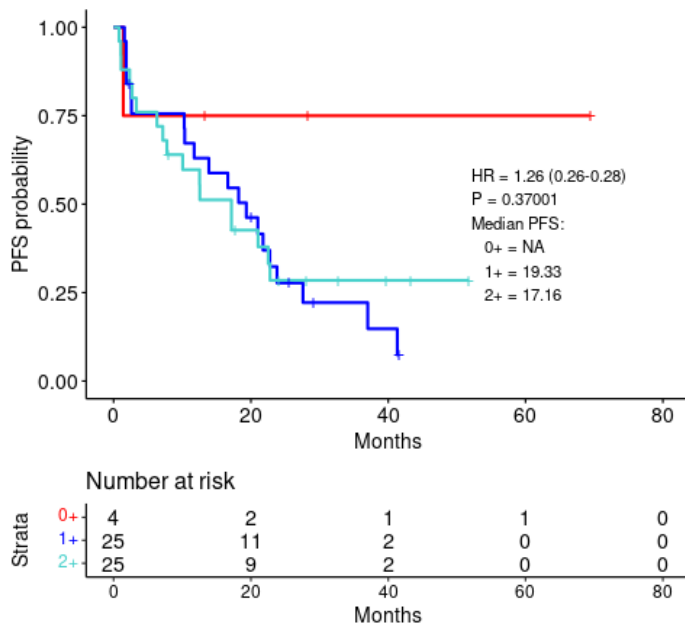

**Supplementary Figure 2.** (a) Kaplan-Meier analysis of progression free survival comparing HER2 expression by IHC across patients taking AI.  $p=0.911$  by log-rank. (b) Kaplan-Meier analysis of progression free survival comparing HER2 expression by IHC across patients taking Fulvestrant.  $p=0.37$  by log-rank.

## Combined Cohort (Nuclear Pleomorphism)

a.

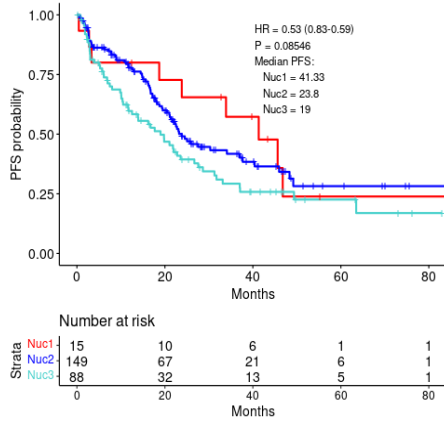

## FUL Cohort (Nuclear Pleomorphism)

d.

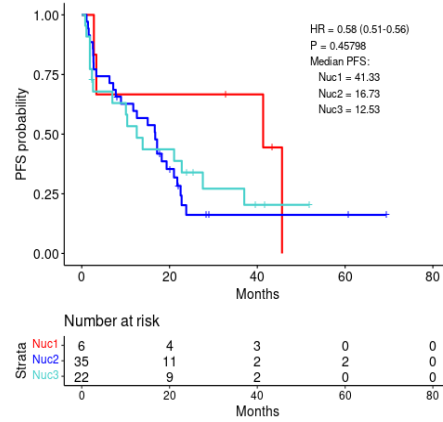

## Combined Cohort (Tubular Differentiation)

b.

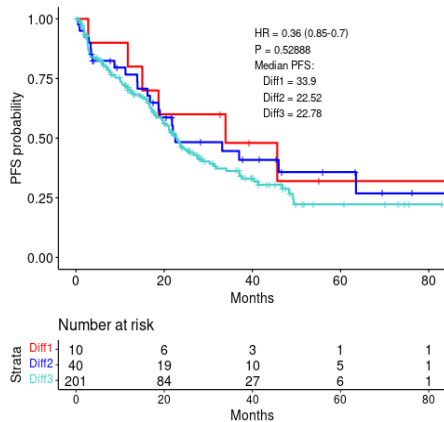

## FUL Cohort (Tubular Differentiation)

e.

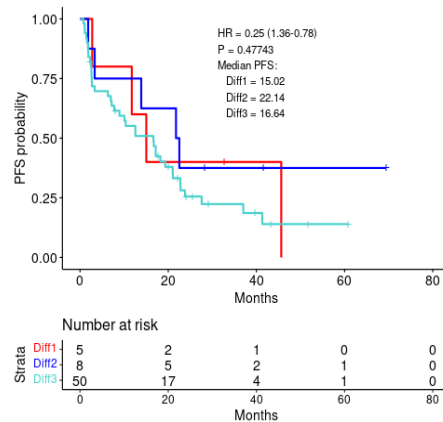

## Combined Cohort (Mitotic Rate)

c.

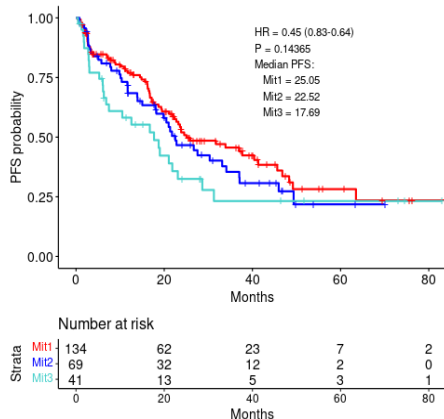

## FUL Cohort (Mitotic Rate)

f.

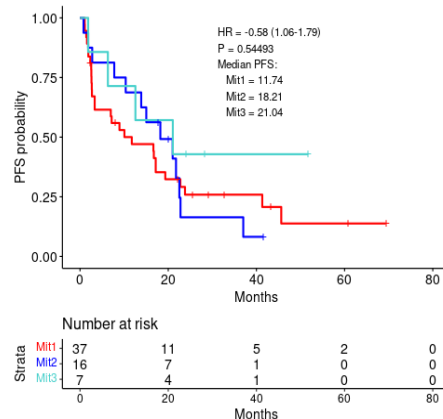

**Supplementary Figure 3.** (a) Kaplan-Meier analysis of progression free survival comparing Nuclear Pleomorphism across all patients.  $p=0.085$  by log-rank. (b) Kaplan-Meier analysis of progression free survival comparing Tubular Differentiation across all patients.  $p=0.529$  by log-rank. (c) Kaplan-Meier analysis of progression free survival comparing Mitotic Rate across all patients.  $p=0.144$  by log-rank. (d) Kaplan-Meier analysis of progression free survival comparing Nuclear Pleomorphism across patients taking Fulvestrant.  $p=0.458$  by log-rank. (e) Kaplan-Meier analysis of progression free survival comparing Tubular Differentiation across patients taking Fulvestrant.  $p=0.477$  by log-rank. (f) Kaplan-Meier analysis of progression free survival comparing Mitotic Rate across patients taking Fulvestrant.  $p=0.545$  by log-rank.

**a.** AI Cohort (SBR&PR)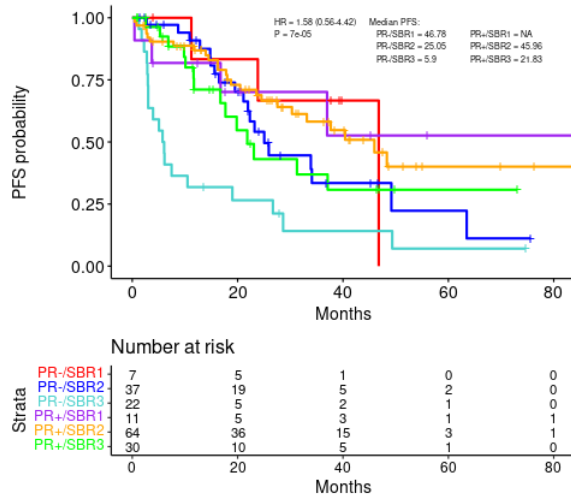**c.** FUL Cohort (SBR&PR)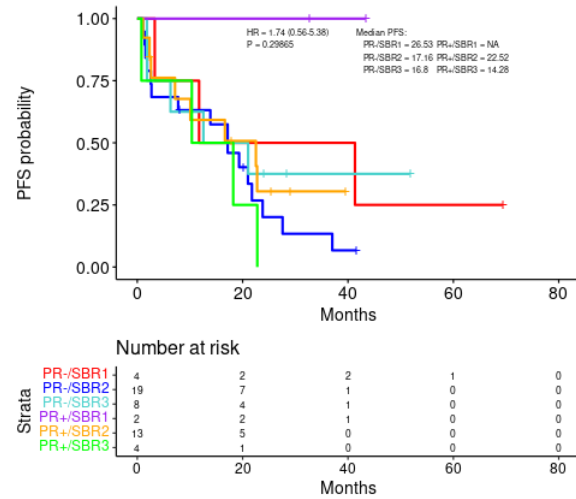**b.**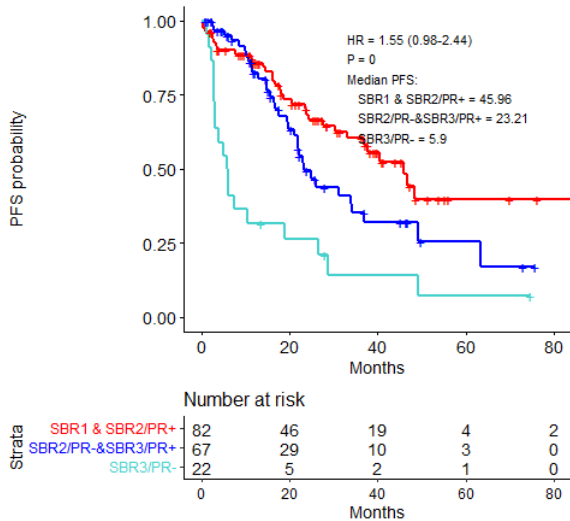**d.**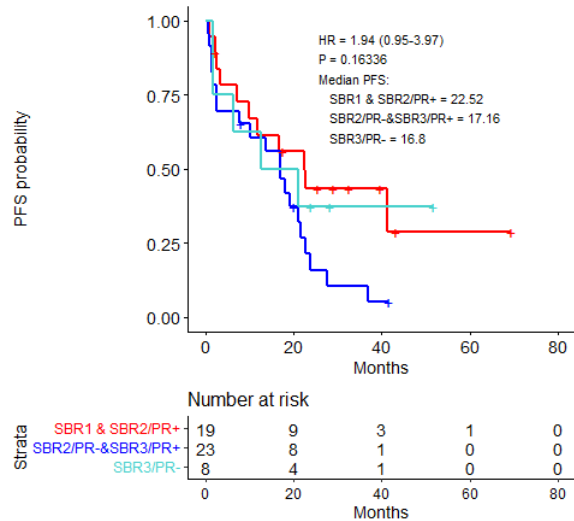

**Supplementary Figure 4.** (a) Kaplan-Meier analysis of progression free survival comparing combinations of overall SBR score and PR status across patients taking AI.  $p < 0.001$  by log-rank. (b) Kaplan-Meier analysis of progression free survival comparing subgroups of overall SBR score and PR status across patients taking AI.  $p < 0.001$  by log-rank. (c) Kaplan-Meier analysis of progression free survival comparing combinations of overall SBR score and PR status across patients taking Fulvestrant.  $p = 0.299$  by log-rank. (d) Kaplan-Meier analysis of progression free survival comparing subgroups of overall SBR score and PR status across patients taking Fulvestrant.  $p = 0.163$  by log-rank.

a.

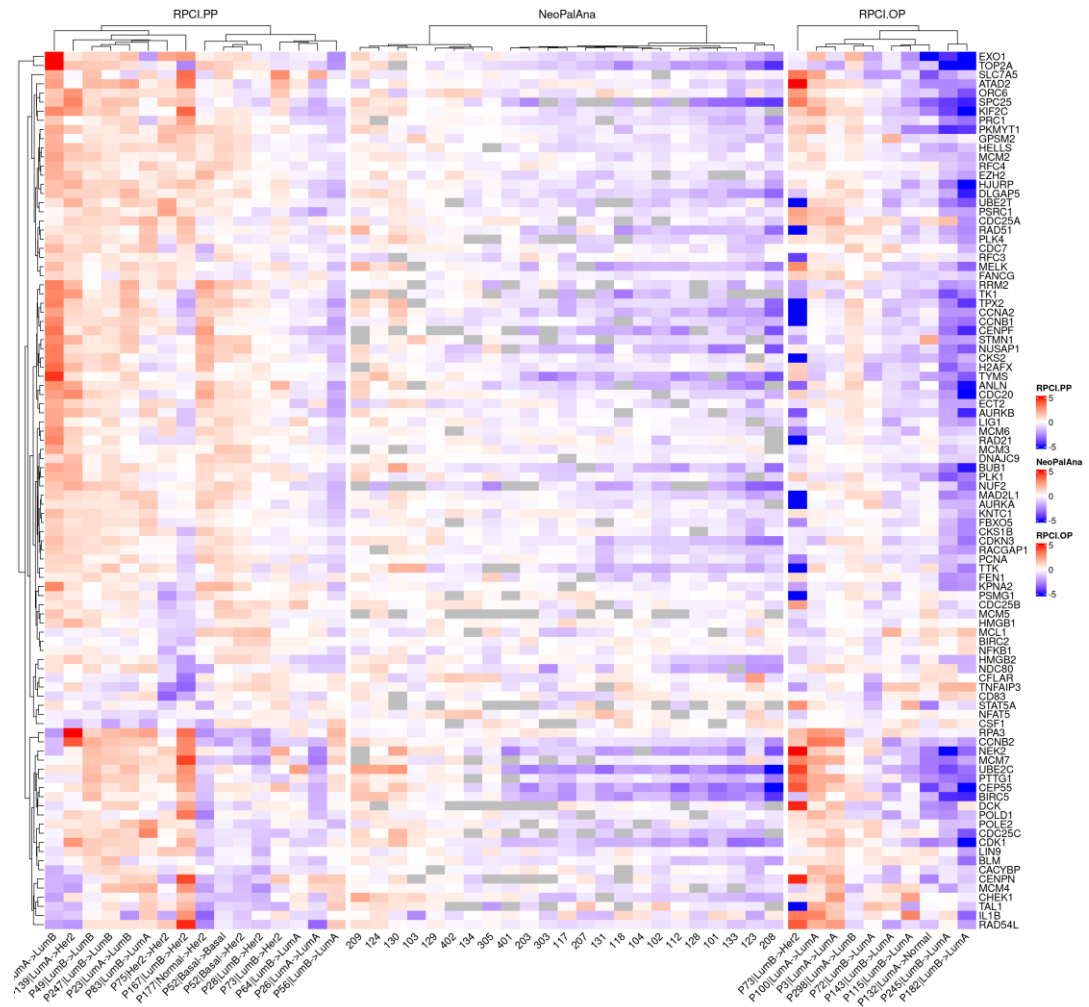

b.

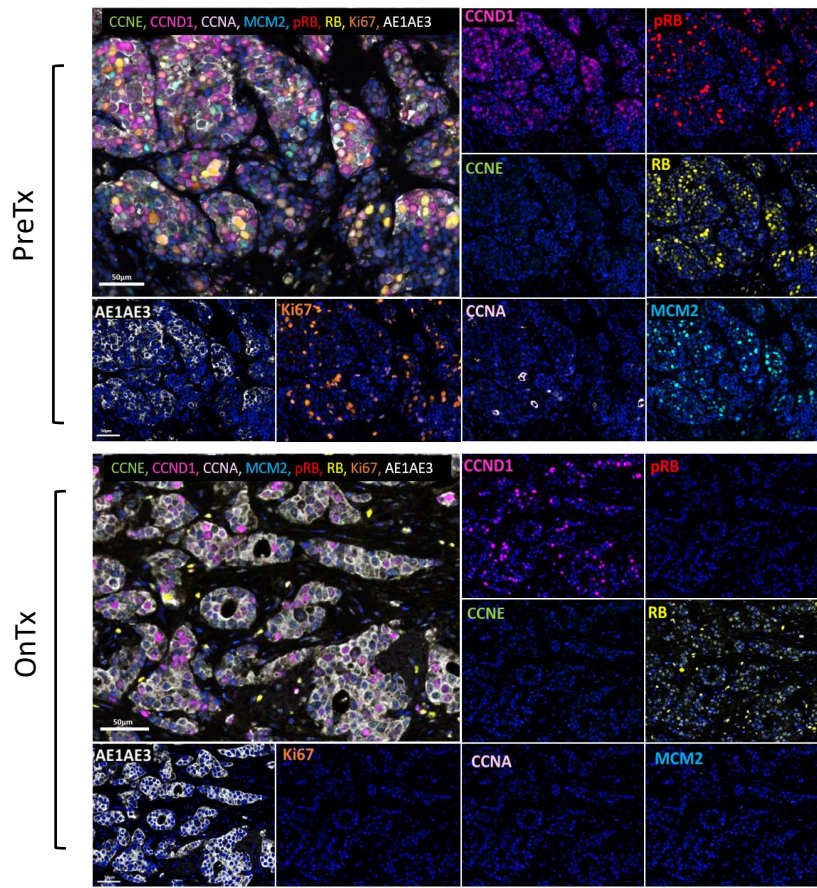

**Supplementary Figure 5.** (a). Heatmap showing suppression of cell cycle gene expression comparing pre- and on-treatment samples, and pre-treatment and post-progression samples (left and right portion) with the data from the NeoPalAna study (center). (b) Multispectral immunofluorescence imaging of paired pre-treatment and on-treatment samples showing suppression of select cell cycle proteins.

**a.**

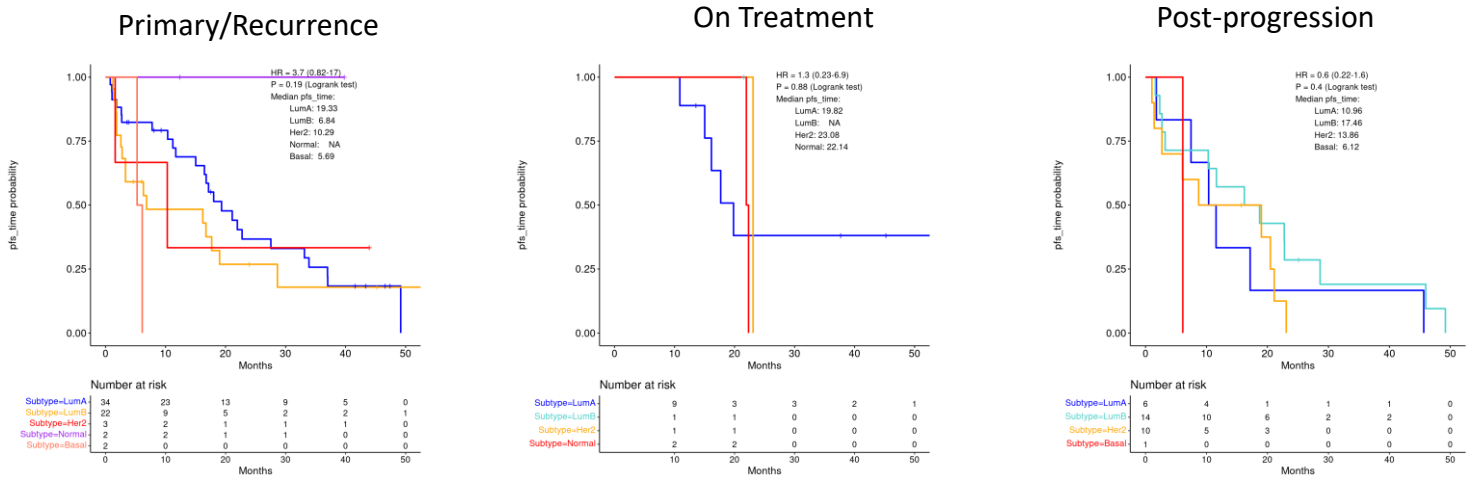

**b.**

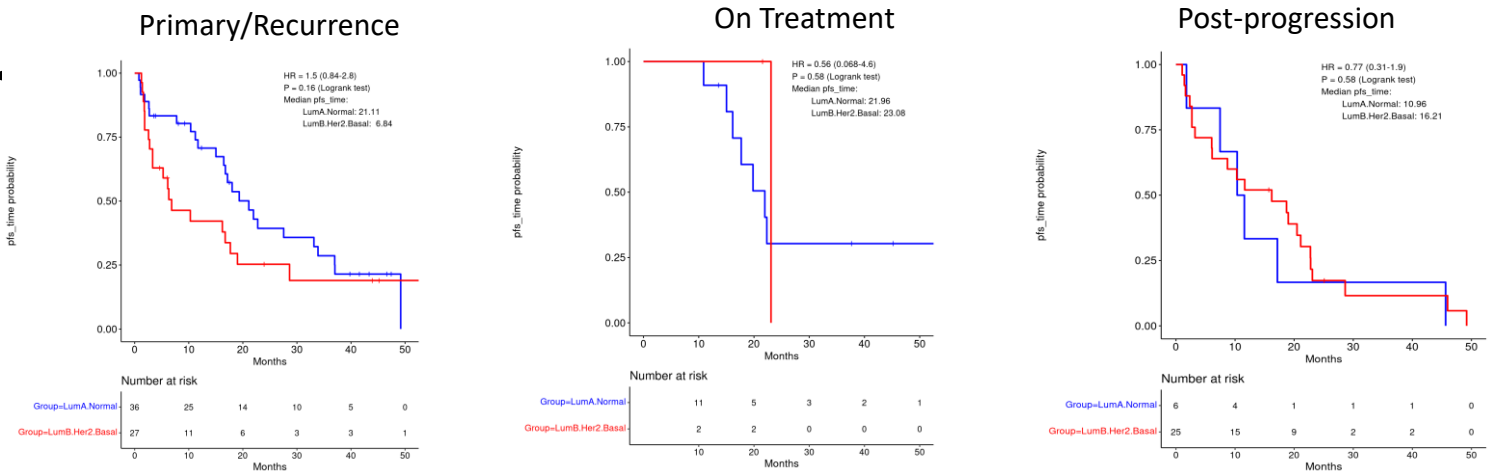



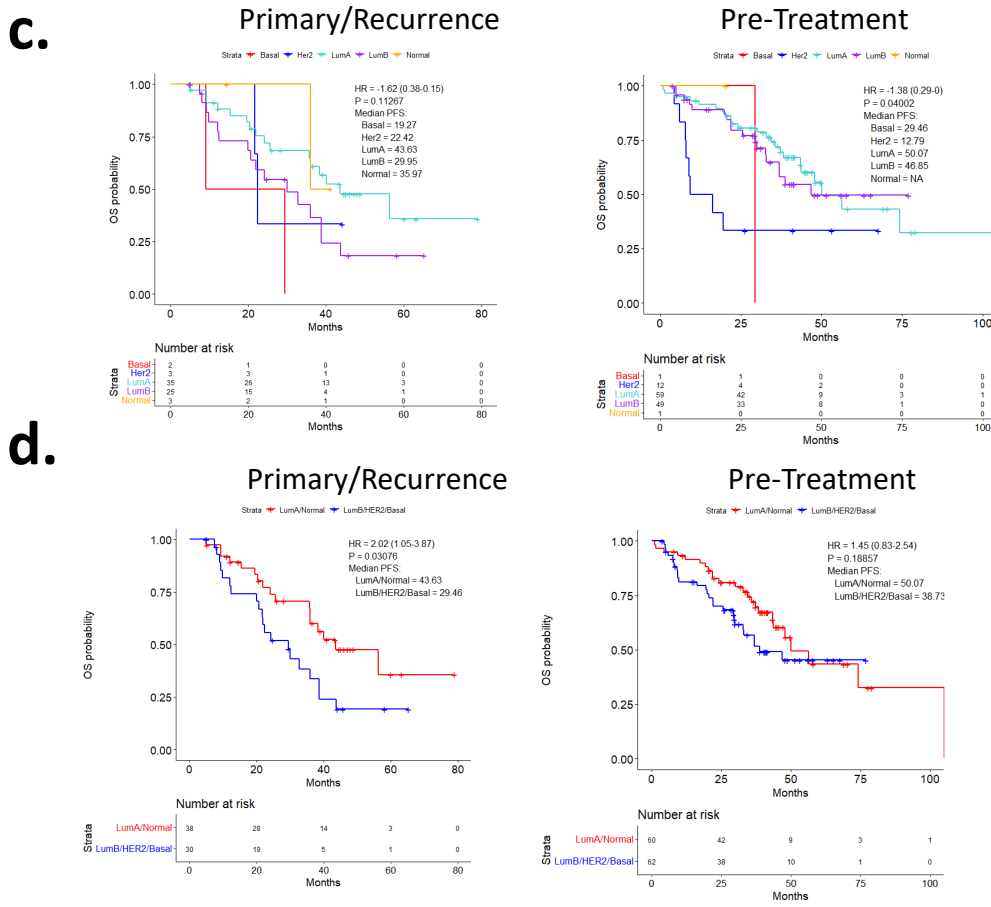

**Supplementary Figure 6.** Testing of survival difference between AIMS subtypes predicted using gene expression data at different treatment timepoints as indicated. (a) Progression-free survival of all AIMS subtypes for primary/recurrence, on treatment, and post-progression timepoints.  $p=0.19$ ,  $p=0.88$ , and  $p=0.4$  by log-rank, respectively. (b) Progression-free survival of LuminalA/Normal and LuminalB/HER2/Basal subtypes for primary/recurrence, on treatment, and post-progression timepoints.  $p=0.16$ ,  $p=0.58$ , and  $p=0.58$  by log-rank, respectively. (c) Overall survival of all AIMS subtypes for primary/recurrence and pre-treatment timepoints.  $p=0.1127$  and  $p=0.04$  by log-rank, respectively. (d) Overall survival of LuminalA/Normal and LuminalB/HER2/Basal subtypes for primary/recurrence and pre-treatment timepoints.  $p=0.0308$  and  $p=0.1886$  by log-rank, respectively.

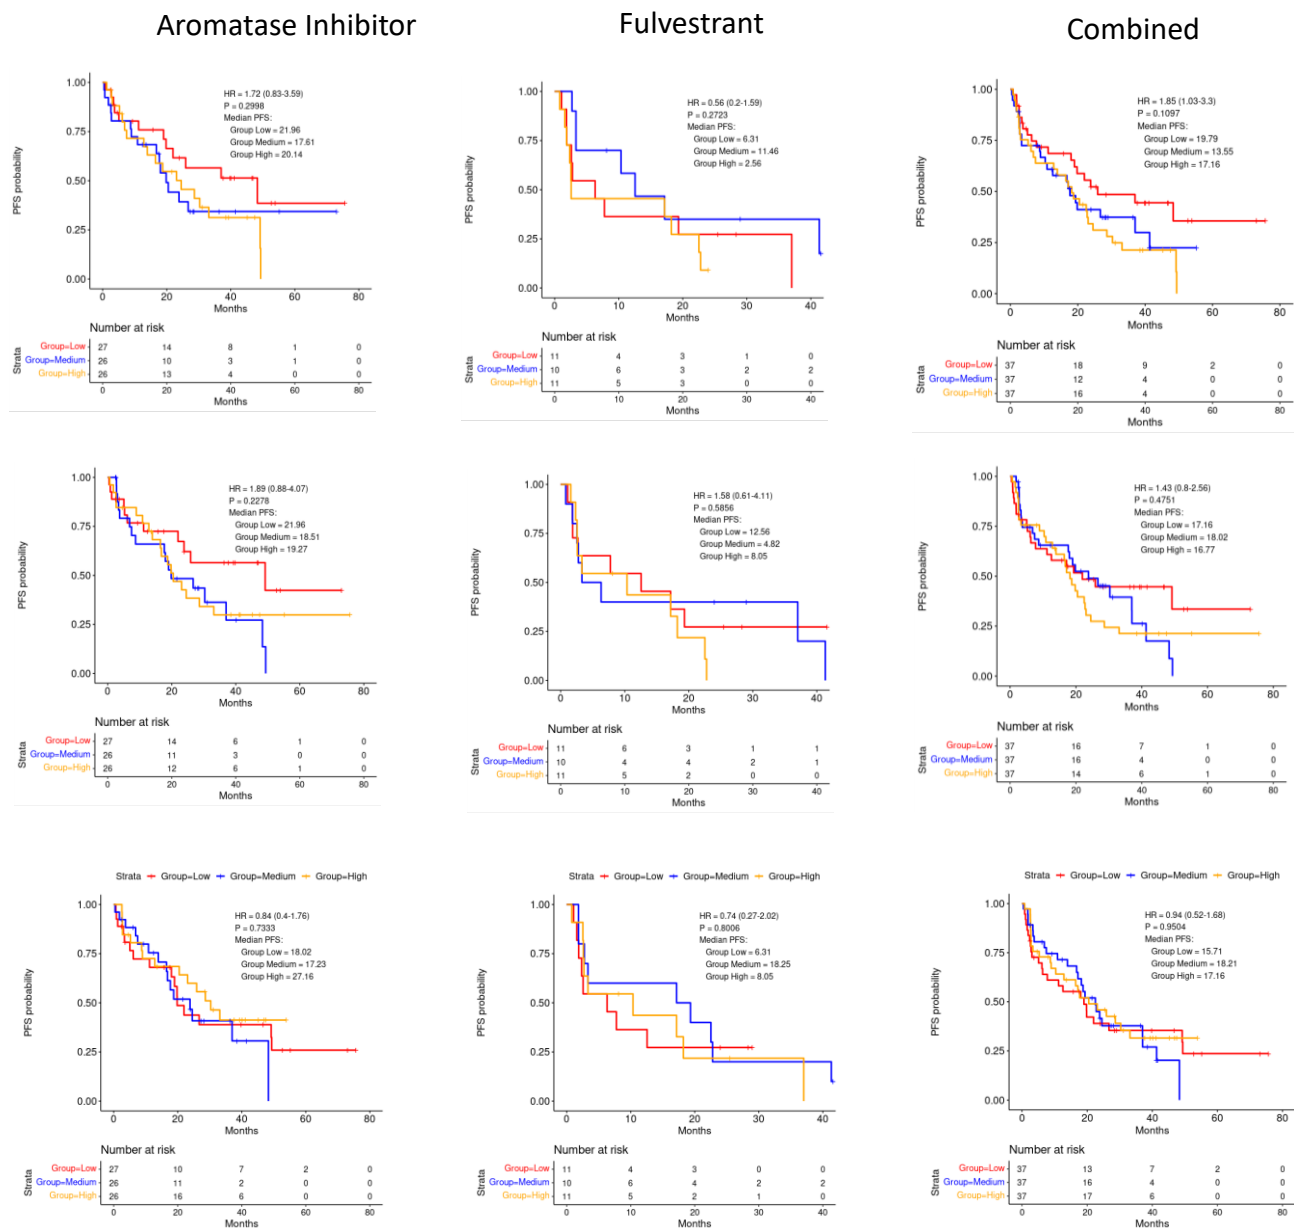

**Supplementary Figure 7.** Testing for association of single genes with progression free survival on the AI, Fulvestrant or combined cohorts. Patients are stratified by tertile of each of the single gene expression values. For CDK4,  $p=0.2998$ ,  $p=0.2723$ , and  $p=0.1097$  by log-rank, respectively. For CCND1,  $p=0.2278$ ,  $p=0.5856$ , and  $p=0.4751$  by log-rank, respectively. For RB1,  $p=0.7333$ ,  $p=0.8006$ , and  $p=0.9504$  by log-rank, respectively.

a.

| Gene         | Combined Cohort |        | AI Cohort |        | FUL Cohort |        |
|--------------|-----------------|--------|-----------|--------|------------|--------|
|              | HR              | P      | HR        | P      | HR         | P      |
| <b>CD22</b>  | 0.7976          | 0.0214 | 0.7999    | 0.0598 | 0.8108     | 0.2675 |
| <b>CD70</b>  | 0.8529          | 0.0106 | 0.8481    | 0.0257 | 0.8032     | 0.1109 |
| <b>CD79A</b> | 0.8433          | 0.0108 | 0.8729    | 0.0880 | 0.6689     | 0.0283 |
| <b>CD83</b>  | 1.0239          | 0.7442 | 1.0944    | 0.3833 | 0.6689     | 0.0297 |
| <b>BATF</b>  | 0.6229          | 0.0008 | 0.5185    | 0.0004 | 0.8692     | 0.5042 |
| <b>CD3D</b>  | 0.8627          | 0.0774 | 0.9094    | 0.3457 | 0.6449     | 0.0137 |
| <b>CD27</b>  | 0.8457          | 0.0061 | 0.8786    | 0.0755 | 0.7625     | 0.0424 |
| <b>CD5</b>   | 0.8791          | 0.0645 | 0.9123    | 0.2809 | 0.7459     | 0.0371 |

b.

| Subtype             | P-code | PFS time    | Average PFS |
|---------------------|--------|-------------|-------------|
| <b>LumA to LumA</b> | P100   | 37.64342309 | 41.4242     |
|                     | P3     | 45.20498405 |             |
| <b>LumB to Her2</b> | P73    | 23.07919913 | 23.0792     |
| <b>LumB to LumA</b> | P115   | 10.88207253 | 23.1515     |
|                     | P143   | 17.6874774  |             |
|                     | P182   | 19.82444028 |             |
|                     | P245   | 13.54505704 |             |
|                     | P72    | 53.81858829 |             |

**Supplementary Figure 8.** (a) Table summarizing association of PFS with select immune gene expression across cohorts of patients. (b) Summary of subtype switching between pre and on-treatment samples with PFS time.

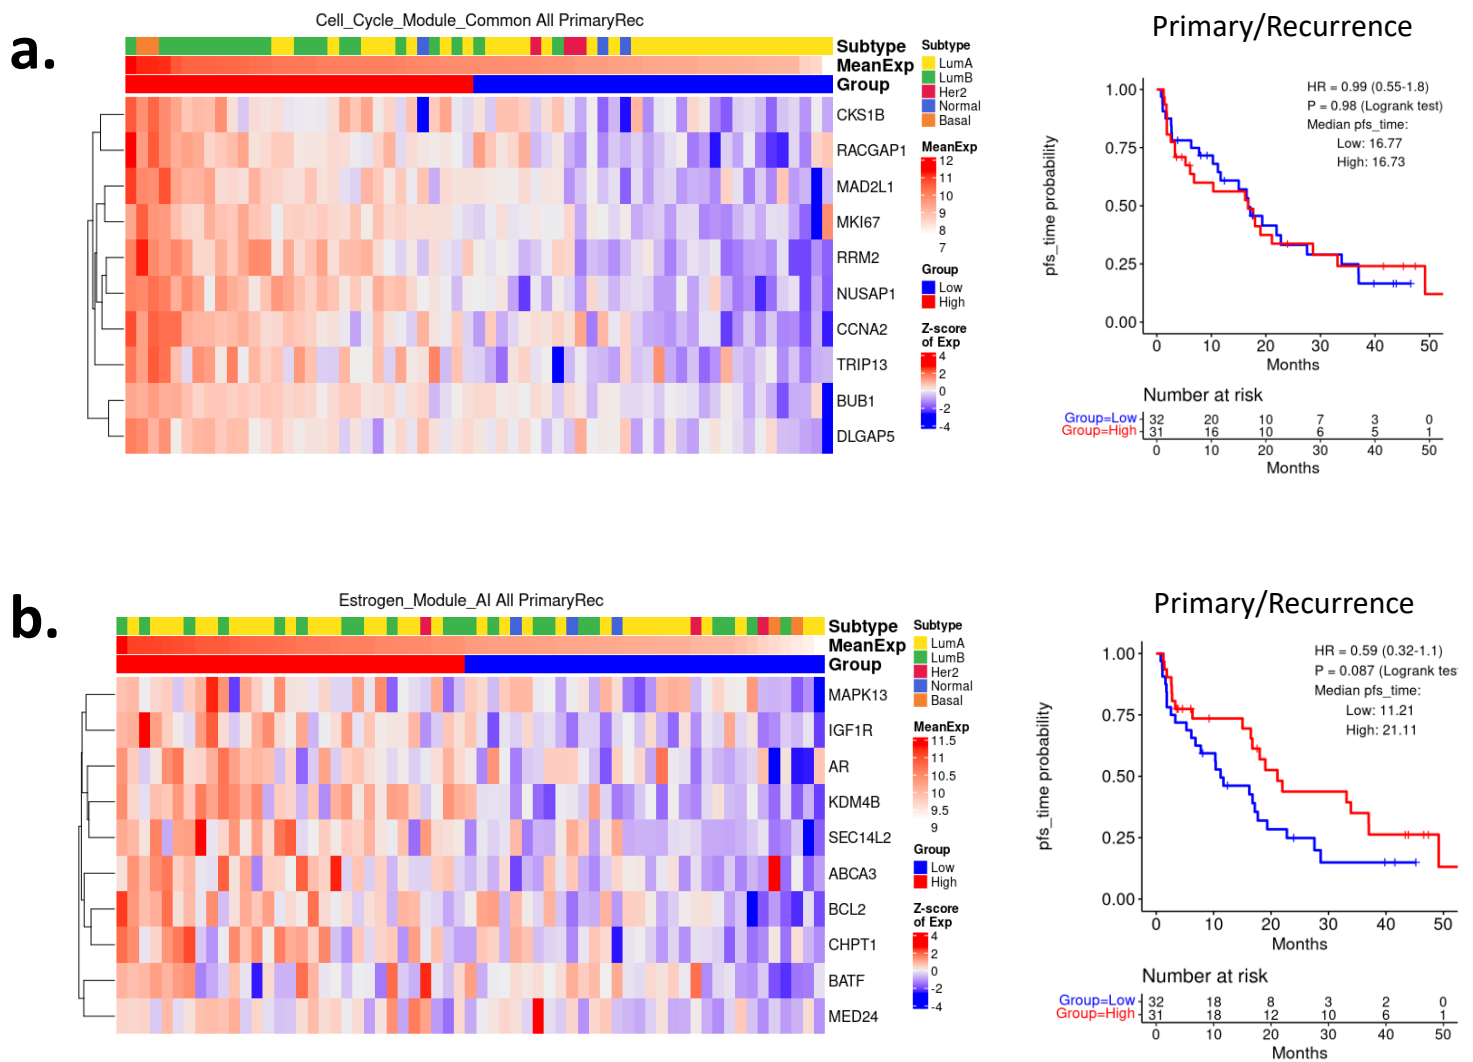

**Supplementary Figure 9.** (a) Heatmap showing gene expression of common cell cycle module in combined AI and Fulvestrant primary/recurrence biopsies and K-M plot comparing PFS between the high and low average gene expression groups using data from primary/recurrent biopsies.  $p=0.98$  by log-rank. (b) Heatmap showing gene expression pattern of the estrogen response module in combined AI and Fulvestrant primary/recurrence biopsies and the associated K-M plot.  $p=0.087$  by log-rank.

a.

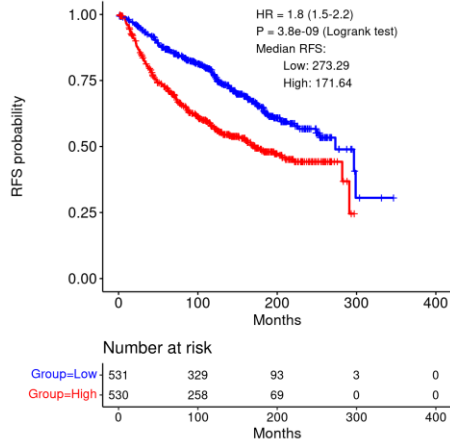

Combined Cohort: Common cell cycle module

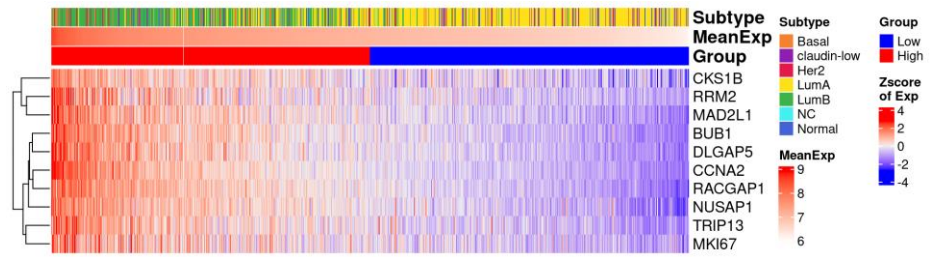

b.

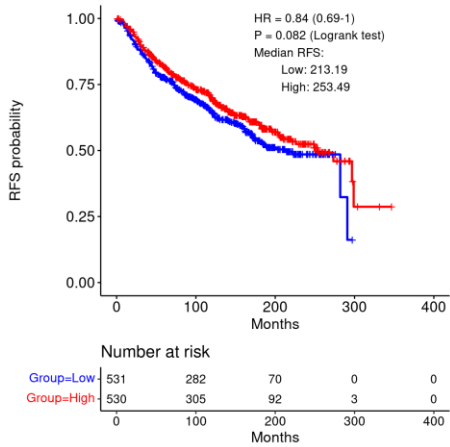

AI Cohort: Estrogen response module

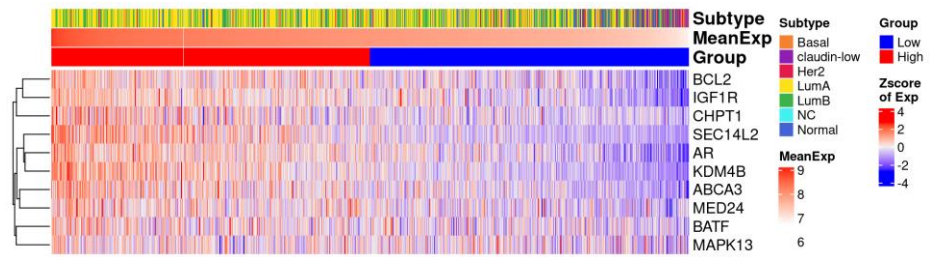

c.

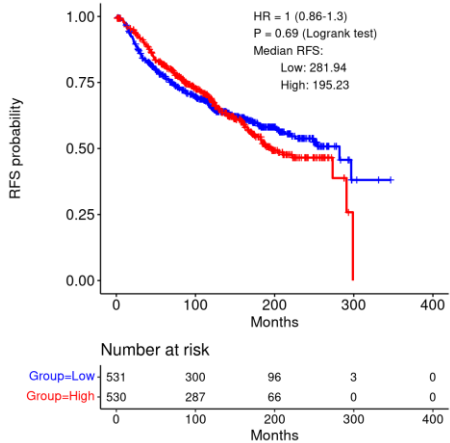

FUL Cohort: TNF-IFN gamma module

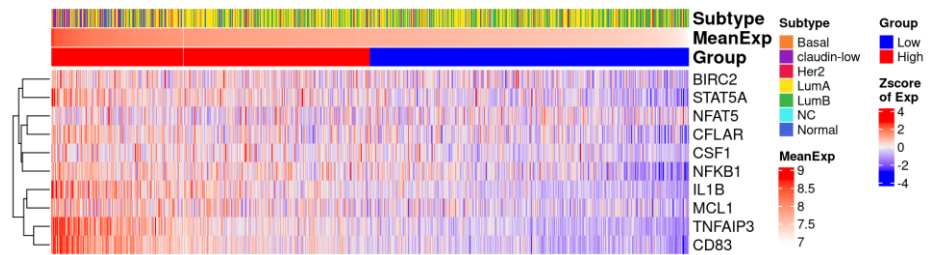

**Supplementary Figure 10.** Evaluation of gene modules on recurrence-free survival on a subset (ER+/HER2-) of the METABRIC dataset. Patients are stratified by mean expression values of the genes in each module. (a) Common cell cycle module.  $p < 0.001$  by log-rank. (b) Estrogen response module.  $p = 0.082$  by log-rank. (c) TNF-IFN gamma module.  $p = 0.69$  by log-rank.

## Overall Survival

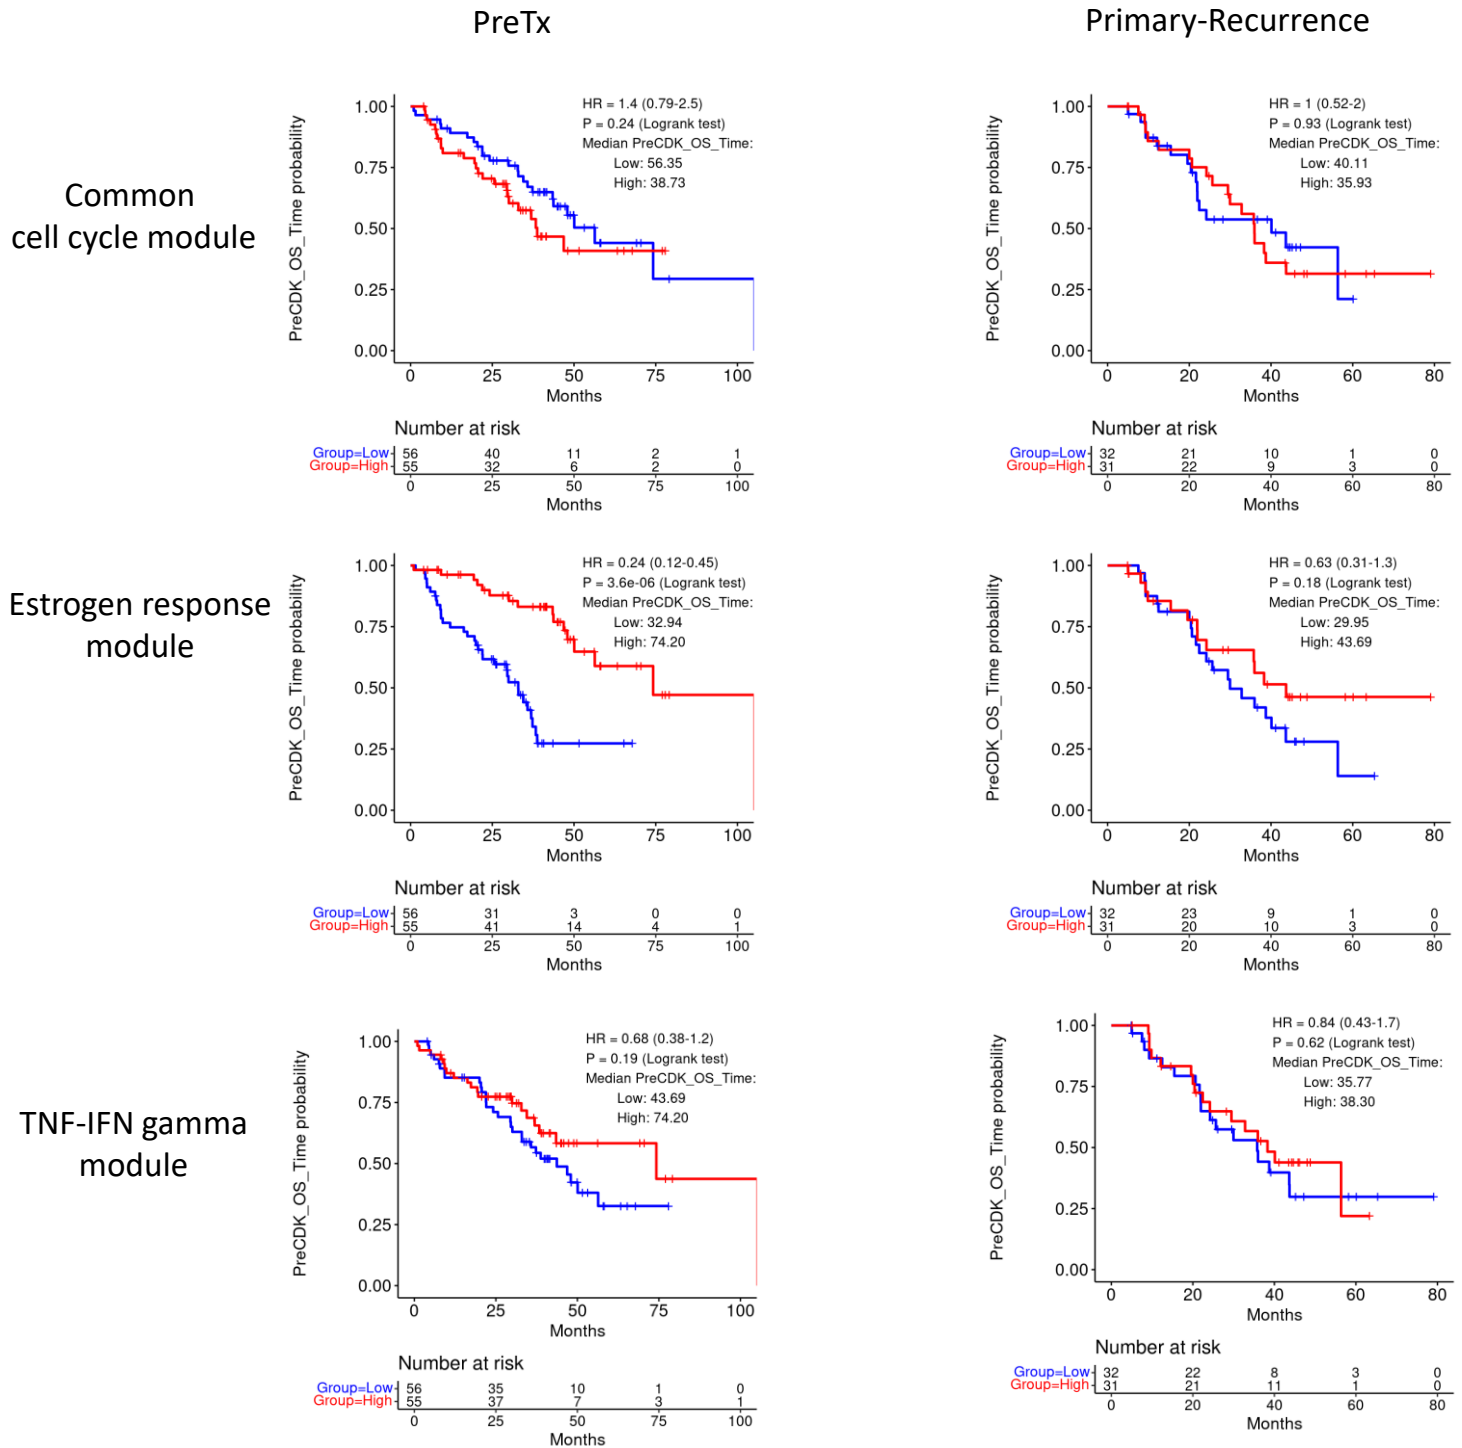

**Supplementary Figure 11.** Evaluation of gene modules on patient overall survival using gene expression data from pre-treatment or primary/recurrence samples. For common cell cycle,  $p=0.24$  and  $p=0.93$  by log-rank, respectively. For estrogen response,  $p<0.001$  and  $p=0.18$  by log-rank, respectively. For TNF-IFN gamma,  $p=0.19$  and  $p=0.62$  by log-rank, respectively.
